# Supplementary material for: Azacitidine Plus Venetoclax for the Treatment of Relapsed and Newly Diagnosed Acute Myeloid Leukemia Patients
Source: MDPI journal article supplement (doi:10.3390/cancers14082025), 2022-04-16
Supplement: s1 [file cancers-1651045-supplementary.pdf › cancers-1651045-supplementary.pdf]

## Article

# Azacitidine plus Venetoclax for the Treatment of Relapsed and Newly Diagnosed Acute Myeloid Leukemia Patients

Sylvain Garciaz <sup>1,2,\*</sup>, Marie-Anne Hospital <sup>2</sup>, Anne-Sophie Alary <sup>3</sup>, Colombe Saillard <sup>2</sup>, Yosr Hicheri <sup>2</sup>, Bilal Mohty <sup>2</sup>, Jérôme Rey <sup>2</sup>, Evelyne D’Incan <sup>2</sup>, Aude Charbonnier <sup>2</sup>, Ferdinand Villetard <sup>2</sup>, Valerio Maisano <sup>2</sup>, Laura Lombardi <sup>2</sup>, Antoine Ittel <sup>3</sup>, Marie-Joelle Mozziconacci <sup>4</sup>, Véronique Gelsi-Boyer <sup>4,5</sup> and Norbert Vey <sup>1,2,\*</sup>

**Supplementary Table S1.** Panel of genes Next-generation sequencing (NGS).

| <i>ABL1</i>      | <i>EZH2</i>   | <i>PTPN11</i>  |
|------------------|---------------|----------------|
| <i>ANKRD26</i>   | <i>FBXW7</i>  | <i>RAD21</i>   |
| <i>ASXL1</i>     | <i>FLT3</i>   | <i>RhoA</i>    |
| <i>ASXL2</i>     | <i>GATA2</i>  | <i>RIT1</i>    |
| <i>ATM</i>       | <i>HRAS</i>   | <i>RUNX1</i>   |
| <i>BCOR</i>      | <i>IDH1</i>   | <i>SETBP1</i>  |
| <i>BCORL1</i>    | <i>IDH2</i>   | <i>SF3B1</i>   |
| <i>BRAF</i>      | <i>JAK2</i>   | <i>SH2B3</i>   |
| <i>CALR</i>      | <i>KDM6A</i>  | <i>SMC1A</i>   |
| <i>CBL</i>       | <i>KIT</i>    | <i>SMC3</i>    |
| <i>CDKN2A</i>    | <i>KRAS</i>   | <i>SRSF2</i>   |
| <i>CEBPalpha</i> | <i>MPL</i>    | <i>STAG2</i>   |
| <i>CREBBP</i>    | <i>NF1</i>    | <i>STAT3</i>   |
| <i>CSF3R</i>     | <i>NOTCH1</i> | <i>SUZ12</i>   |
| <i>CSNK1A1</i>   | <i>NOTCH2</i> | <i>TET2</i>    |
| <i>CUX1</i>      | <i>NPM1</i>   | <i>TNFAIP3</i> |
| <i>DDX41</i>     | <i>NRAS</i>   | <i>TP53</i>    |
| <i>DNMT3A</i>    | <i>PHF6</i>   | <i>U2AF1</i>   |
| <i>ETNK1</i>     | <i>PPMD1</i>  | <i>WT1</i>     |
| <i>ETV6</i>      | <i>PTEN</i>   | <i>ZRSR2</i>   |

**Supplementary Table S2.** Response rates at Day-28 and Day-56.

|                                  | Total |    | ND AML |    | R/R AML |    |
|----------------------------------|-------|----|--------|----|---------|----|
|                                  | N     | %  | N      | %  | N       | %  |
| <b>Response at day-28 (n=77)</b> |       |    |        |    |         |    |
| CR                               | 10    | 13 | 6      | 16 | 4       | 10 |
| CRi                              | 11    | 14 | 7      | 18 | 4       | 10 |
| PR                               | 2     | 3  | 1      | 3  | 1       | 3  |
| MLFS                             | 13    | 17 | 9      | 24 | 4       | 10 |
| SD/PD                            | 31    | 40 | 12     | 32 | 19      | 49 |
| death                            | 9     | 12 | 2      | 5  | 7       | 18 |
| unknown                          | 1     | 1  | 1      | 3  | -       | -  |
| <b>Response at day-56 (n=77)</b> |       |    |        |    |         |    |
| CR                               | 17    | 22 | 12     | 32 | 5       | 13 |
| CRi                              | 8     | 10 | 5      | 13 | 3       | 8  |
| PR                               | 1     | 1  | 0      | -  | 1       | 3  |
| MLFS                             | 10    | 13 | 5      | 13 | 5       | 13 |
| SD/PD                            | 27    | 35 | 8      | 21 | 19      | 49 |
| death                            | 12    | 16 | 6      | 16 | 6       | 15 |

|  |         |   |   |   |   |   |   |
|--|---------|---|---|---|---|---|---|
|  | unknown | 2 | 3 | 2 | 5 | 0 | 0 |
|--|---------|---|---|---|---|---|---|

**Supplementary Table S3.** Response rates at Day-28 and Day-56 in the group of the VIALE-A eligible patients.

|                           |         | 1st line |    |
|---------------------------|---------|----------|----|
| Response at day-28 (n=64) |         | N        | %  |
|                           | CR      | 4        | 14 |
|                           | CRi     | 6        | 21 |
|                           | PR      | 1        | 3  |
|                           | MLFS    | 8        | 28 |
|                           | SD/PD   | 8        | 28 |
|                           | death   | 1        | 3  |
|                           | unknown | 1        | 3  |
| Response at day-56 (n=64) |         |          |    |
|                           | CR      | 8        | 28 |
|                           | CRi     | 5        | 17 |
|                           | PR      | 0        | 0  |
|                           | MLFS    | 5        | 17 |
|                           | SD/PD   | 5        | 17 |
|                           | death   | 4        | 14 |
|                           | unknown | 2        | 7  |

**Supplementary Table S4.** Response rates assessed at day-56 in the cytogenetics and molecular subgroups and according to VEN cycle 1 dose.

| cytogenetics              |         | non-adverse |    | adverse      |    |
|---------------------------|---------|-------------|----|--------------|----|
| Response at day-56 (n=77) |         | N           | %  |              | %  |
|                           | CR      | 8           | 20 | 9            | 25 |
|                           | CRi     | 5           | 12 | 3            | 8  |
|                           | PR      | 1           | 2  | 0            | 0  |
|                           | MLFS    | 9           | 22 | 2            | 6  |
|                           | SD/PD   | 13          | 32 | 13           | 36 |
|                           | death   | 4           | 10 | 8            | 22 |
|                           | unknown | 1           | 2  | 1            | 3  |
| Molecular subgroup        |         | TP53/RAS WT |    | TP53/RAS mut |    |
| Response at day-56 (n=54) |         |             |    |              |    |
|                           | CR      | 9           | 28 | 4            | 18 |
|                           | CRi     | 5           | 16 | 2            | 9  |
|                           | PR      | 0           | 0  | 0            | 0  |
|                           | MLFS    | 7           | 22 | 3            | 14 |
|                           | SD/PD   | 5           | 16 | 10           | 45 |
|                           | death   | 4           | 13 | 3            | 14 |
|                           | unknown | 2           | 6  | 0            | 0  |
| VEN cycle 1 dose          |         | >50%        |    | ≤50%         |    |
| Response at day-56 (n=54) |         | N           | %  |              |    |
|                           | CR      | 9           | 18 | 7            | 32 |
|                           | CRi     | 6           | 12 | 2            | 9  |
|                           | PR      | 0           | 0  | 1            | 5  |
|                           | MLFS    | 8           | 16 | 3            | 14 |
|                           | SD/PD   | 19          | 37 | 6            | 27 |

|         |   |    |   |   |
|---------|---|----|---|---|
| death   | 8 | 16 | 2 | 9 |
| unknown | 1 | 2  | 1 | 5 |

**Supplementary Table S5.** Factors associated with response in the ND-AML group.

| ND-AML                              | responders |          | dead/non responders |          | RR               | P value |
|-------------------------------------|------------|----------|---------------------|----------|------------------|---------|
| N, %                                | 22         | 100      | 14                  | 100      |                  |         |
| male                                | 12         | 55       | 10                  | 71       | 0.76 (0.46-1.27) | 0.48    |
| age, median (range)                 | 74         | (61-81)  | 72                  | (67-79)  |                  | 0.95    |
| age >75 years                       | 7          | 32       | 6                   | 43       | 0.82 (0.46-1.48) | 0.73    |
| Secondary AML                       | 16         | 73       | 10                  | 71       | 0.92 (0.55-1.82) | 1       |
| AML-MRC                             | 10         | 45       | 3                   | 21       |                  | 0.17    |
| therapy-related                     | 2          | 9        | 2                   | 14       |                  | 1       |
| post MPN                            | 4          | 18       | 5                   | 36       |                  | 0.26    |
| Previous azacitidine                | 2          | 9        | 3                   | 21       | 0.62 (0.21-1.87) | 0.36    |
| WBC, median (range)                 | 1.8        | (0.4-60) | 8.8                 | (0.8-40) |                  | 0.47    |
| WBC >10G/L                          | 7          | 32       | 5                   | 36       | 0.97 (0.55-1.73) | 1       |
| plt count, median (range)           | 100        | (11-272) | 55                  | (3-200)  |                  | 0.18    |
| plt <20G/L                          | 3          | 14       | 4                   | 29       | 0.65 (0.27-1.60) | 0.39    |
| BM blasts, median (range)           | 36         | (7-70)   | 36                  | (12-88)  |                  | 0.83    |
| BM blasts <30%                      | 9          | 41       | 6                   | 43       | 0.97 (0.57-1.65) | 1       |
| Adverse cytogenetics                | 13         | 59       | 8                   | 57       | 1.03 (0.61-1.76) | 1       |
| monosomal                           | 8          | 36       | 4                   | 29       |                  | 1       |
| complex                             | 7          | 32       | 6                   | 43       |                  | 0.83    |
| genomic alteration                  |            |          |                     |          |                  |         |
| NPM1                                | 2          | 14       | 1                   | 7        | 1.13 (0.49-2.65) | 1       |
| FLT3                                | 1          | 7        | 1                   | 7        | 0.83 (0.2-3.4)   | 1       |
| ITD                                 | 0          | 0        | 0                   | 0        |                  | -       |
| TKD                                 | 1          | 7        | 1                   | 7        |                  | -       |
| IDH (n=37)                          | 5          | 23       | 3                   | 21       | 1.02 (0.56-1.9)  | 1       |
| IDH1                                | 4          | 18       | 3                   | 21       |                  | -       |
| IDH2                                | 1          | 5        | 0                   | 0        |                  | -       |
| TP53 (n=33)                         | 3          | 14       | 5                   | 42       | 0.52 (0.20-1.31) | 0.10    |
| JAK2 (n=31)                         | 2          | 10       | 5                   | 42       | 0.39 (0.12-1.31) | 0.07    |
| ASXL1 (n=28)                        | 7          | 39       | 5                   | 50       | 0.9 (0.49-1.63)  | 1       |
| RUNX1 (n=28)                        | 4          | 22       | 4                   | 40       | 0.75 (0.35-1.6)  | 0.43    |
| TET2 (n=28)                         | 3          | 17       | 4                   | 40       | 0.63 (0.25-1.55) | 0.37    |
| DNMT3A (n=28)                       | 2          | 11       | 3                   | 30       | 0.6 (0.2-1.8)    | 0.34    |
| SFSR2 (n=28)                        | 4          | 22       | 3                   | 30       | 0.89 (0.44-1.84) | 1       |
| NRAS (n=28)                         | 4          | 22       | 3                   | 30       |                  | 1       |
| RAS/TP53 (n=28)                     | 4          | 22       | 7                   | 70       | 0.69 (0.33-1.46) | 0.41    |
| VEN dose >50% during cycle 1 (n=37) | 11         | 52       | 9                   | 69       | 0.86 (0.49-1.49) | 0.72    |

**Supplementary Table S6.** Factors associated with response in the R/R-AML group.

| R/R cohort | responding | death/non responding | RR | P value |
|------------|------------|----------------------|----|---------|
|------------|------------|----------------------|----|---------|

|                                        |           |          |            |          |                  |       |
|----------------------------------------|-----------|----------|------------|----------|------------------|-------|
| N, %                                   | <b>14</b> | 100      | <b>25</b>  | 100      |                  | -     |
| male                                   | <b>10</b> | 71       | <b>14</b>  | 56       | 1.56 (0.59-4.09) | 0.49  |
| age, median (range)                    | <b>75</b> | (22-86)  | <b>65</b>  | (22-77)  |                  | 0.10  |
| age >75 years                          | <b>7</b>  | 50       | <b>2</b>   | 8        | 3.33 (1.59-6.97) | 0.005 |
| Secondary AML                          | <b>5</b>  | 36       | <b>14</b>  | 56       | 0.58 (0.24-1.43) | 0.32  |
| AML-MRC                                | <b>4</b>  | 29       | <b>8</b>   | 32       |                  | 1     |
| therapy-related                        | <b>0</b>  | 0        | <b>3</b>   | 12       |                  | 0.54  |
| post MPN                               | <b>1</b>  | 7        | <b>3</b>   | 12       |                  | 1     |
| Previous treatments                    |           |          |            |          |                  |       |
| median number of line                  | <b>2</b>  | (1-3)    | <b>1</b>   | (1-4)    |                  | 0.63  |
| Azacitidine                            | <b>3</b>  | 21       | <b>7</b>   | 28       | 0.71 (0.26-2.13) | 0.72  |
| median cycle (range)                   | <b>6</b>  | (3-20)   | <b>4</b>   | (3-8)    |                  | 0.22  |
| chemotherapy                           | <b>14</b> | 100      | <b>20</b>  | 80       | 0.38 (0.39-15.5) | 0.14  |
| allogenic transplantation              | <b>3</b>  | 21       | <b>7</b>   | 28       | 0.79 (0.28-2.27) | 0.72  |
| WBC, median (range)                    | <b>2</b>  | (0.4-13) | <b>4.5</b> | (7-73)   |                  | 0.21  |
| WBC >10G/L                             | <b>2</b>  | 14       | <b>7</b>   | 28       | 0.56 (0.15-2.54) | 0.44  |
| plt count, median (range)              | <b>55</b> | (5-757)  | <b>21</b>  | (0.6-73) |                  | 0.26  |
| plt <20G/L                             | <b>4</b>  | 29       | <b>9</b>   | 36       | 0.73 (0.30-2.01) | 0.73  |
| BM blasts, median (range)              | <b>37</b> | (8-77)   | <b>29</b>  | (10-92)  |                  | 0.82  |
| BM blasts <30%                         | <b>5</b>  | 36       | <b>12</b>  | 48       | 0.72 (0.29-1.76) | 0.52  |
| Adverse cytogenetics                   | <b>1</b>  | 7        | <b>13</b>  | 52       | 0.13 (0.02-0.90) | 0.005 |
| monosomal                              | <b>0</b>  | 0        | <b>11</b>  | 44       |                  | 0.003 |
| complex                                | <b>0</b>  | 0        | <b>10</b>  | 40       |                  | 0.007 |
| genomic alteration                     |           |          |            |          |                  |       |
| NPM1                                   | <b>3</b>  | 21       | <b>3</b>   | 12       | 1.5 (0.59-3.82)  | 0.65  |
| FLT3                                   | <b>3</b>  | 21       | <b>4</b>   | 16       | 1.25 (0.47-3.32) | 0.69  |
| ITD                                    | <b>2</b>  | 14       | <b>4</b>   | 16       |                  | -     |
| TKD                                    | <b>1</b>  | 7        | <b>0</b>   | 0        |                  | -     |
| IDH (n=37)                             | <b>6</b>  | 43       | <b>4</b>   | 17       | 2 (0.95-4.21)    | 0.13  |
| IDH1                                   | <b>2</b>  | 14       | <b>1</b>   | 4        |                  | -     |
| IDH2                                   | <b>4</b>  | 29       | <b>3</b>   | 13       |                  | -     |
| TP53 (n=32)                            | <b>2</b>  | 15       | <b>5</b>   | 26       | 0.69 (0.20-2.42) | 0.68  |
| JAK2 (n=28)                            | <b>1</b>  | 8        | <b>1</b>   | 6        | 1.18 (0.28-5.07) | 1     |
| ASXL1 (n=24)                           | <b>3</b>  | 27       | <b>1</b>   | 8        | 1.87 (0.86-4.09) | 0.30  |
| RUNX1 (n=24)                           | <b>4</b>  | 36       | <b>4</b>   | 31       | 1.14 (0.47-2.78) | 1     |
| TET2 (n=24)                            | <b>4</b>  | 36       | <b>3</b>   | 23       | 1.39 (0.59-3.27) | 0.66  |
| DNMT3A (n=24)                          | <b>3</b>  | 27       | <b>5</b>   | 38       | 0.95 (0.38-2.36) | 0.68  |
| SFSR2 (n=24)                           | <b>4</b>  | 36       | <b>1</b>   | 8        | 2.17 (1.04-4.52) | 0.14  |
| RAS/TP53 (n=28)                        | <b>2</b>  | 18       | <b>7</b>   | 54       | 0.37 (0.10-1.35) | 0.10  |
| VEN dose >50% during cycle 1<br>(n=34) | <b>11</b> | 79       | <b>19</b>  | 83       | 0.86 (0.32-2.27) | 1     |

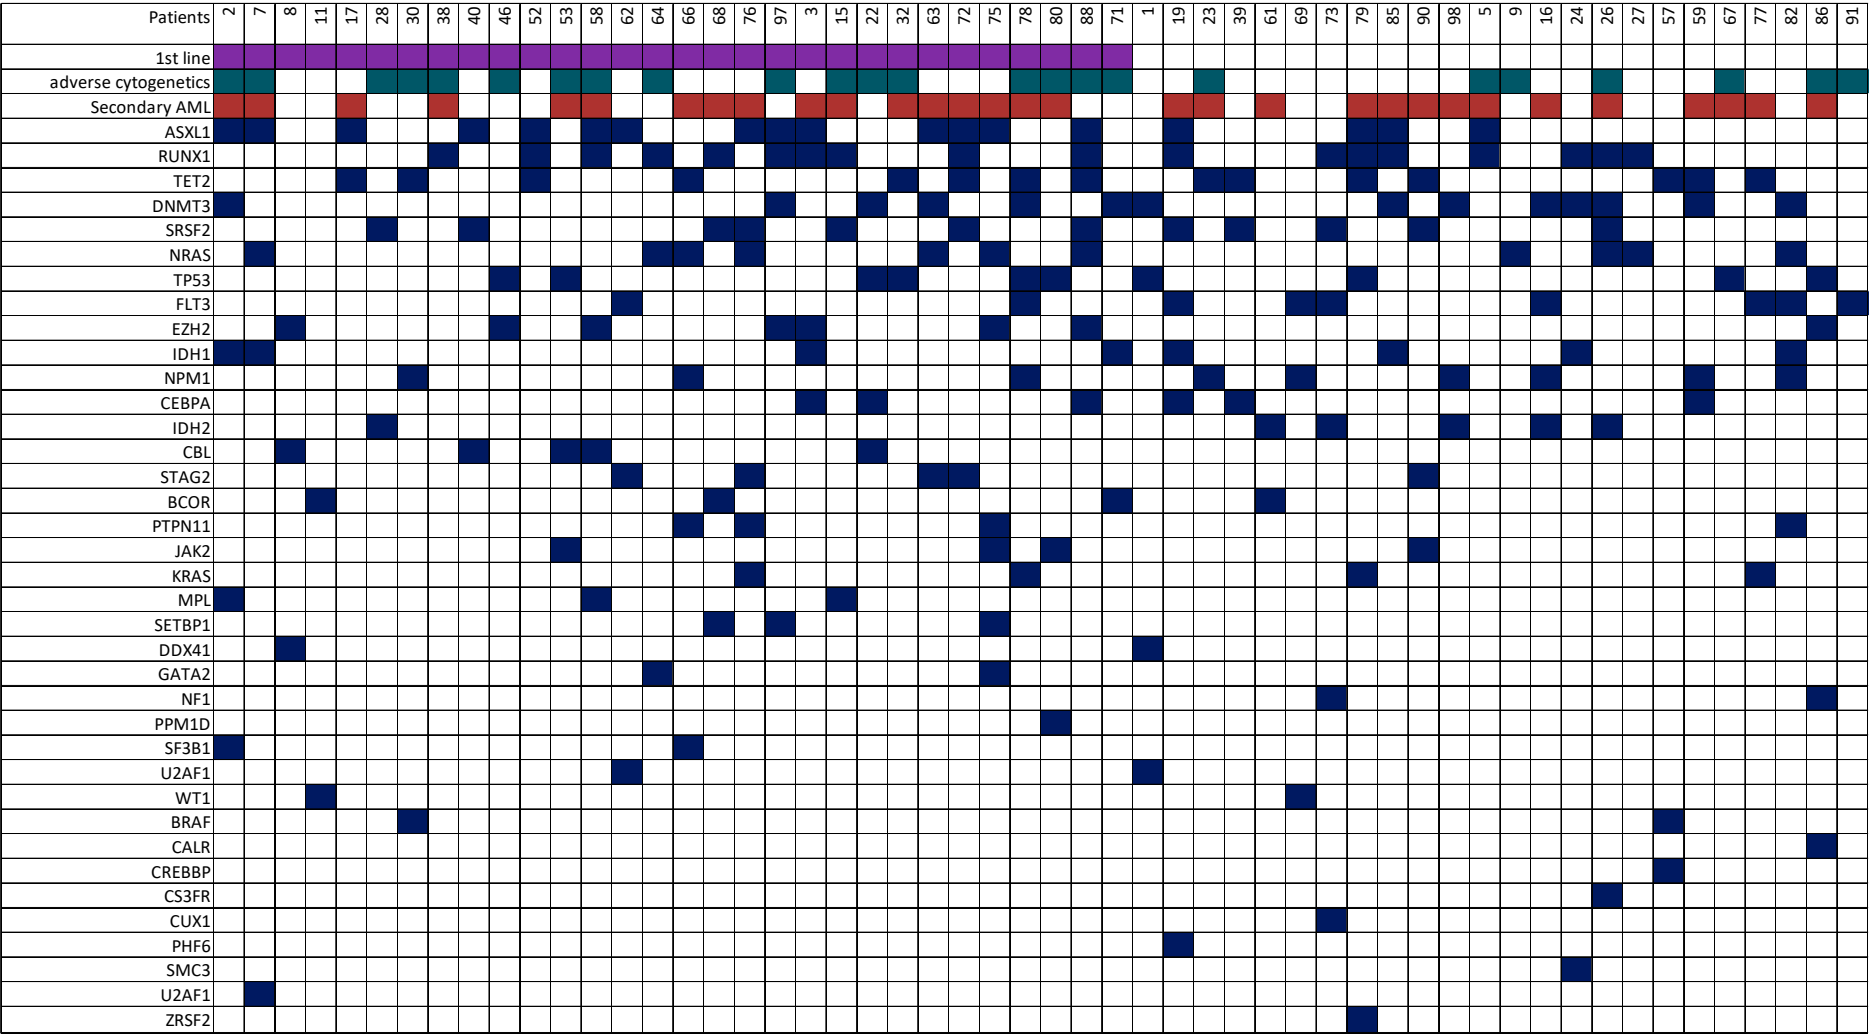

**Supplementary Figure S1.** Oncoprint showing the set of gene mutations found in the whole VEN-AZA treated population according to treatment groups, cytogenetics and type of AML.

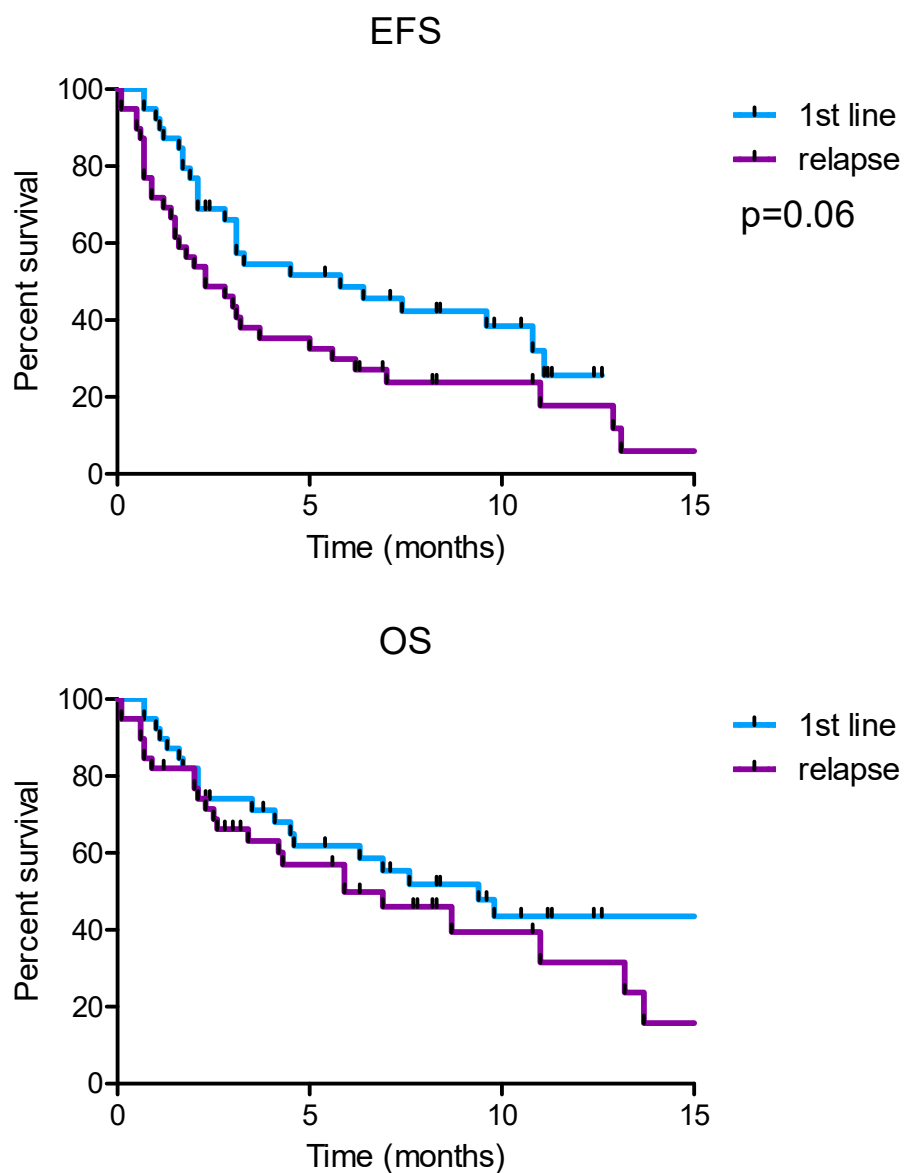

**Supplementary Figure S2.** Kaplan-Meier analyses showing overall survival and event-free survival in the ND AML group and the R/R group of patients.

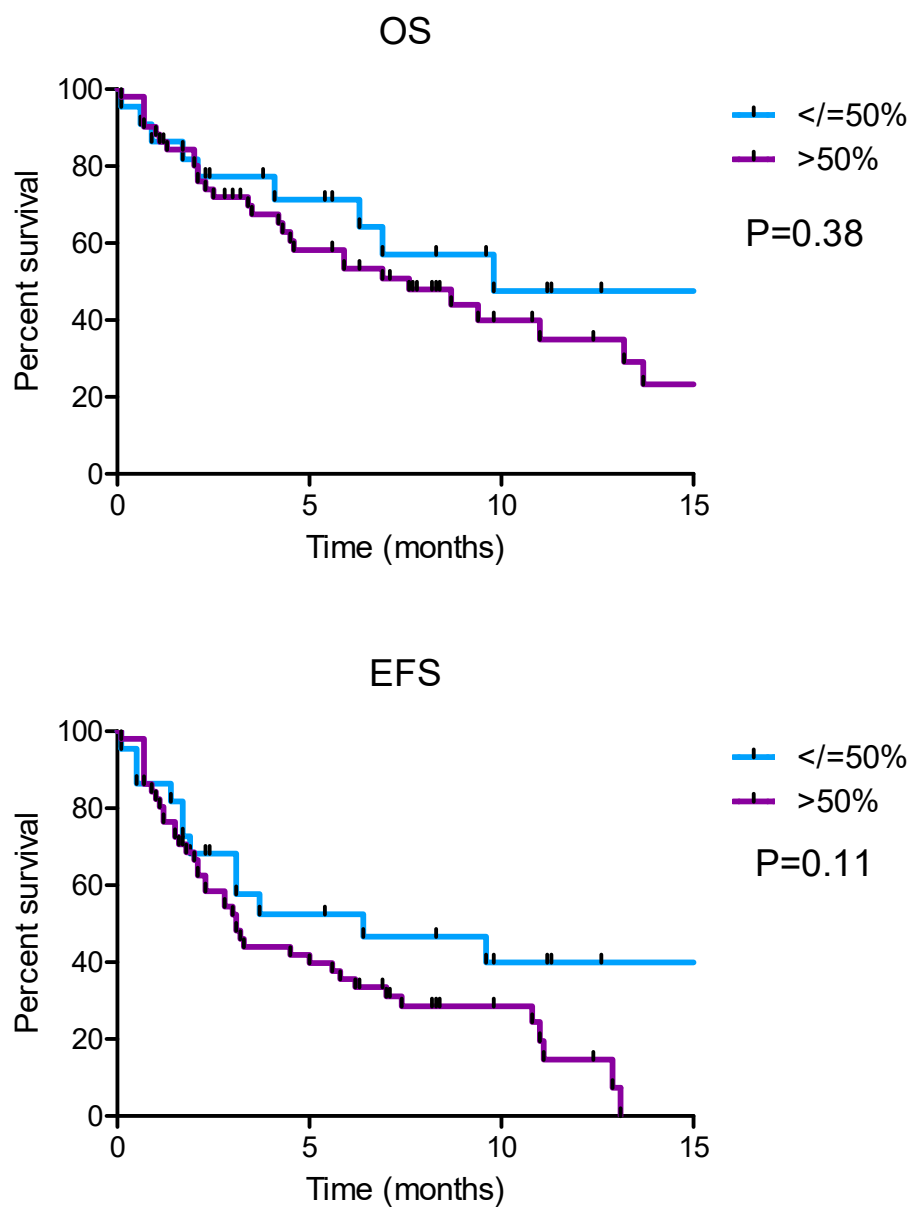

**Supplementary Figure S3.** Kaplan-Meier analyses showing overall survival (OS) and event-free survival (EFS) according to the percentage of maximum venetoclax dose during the first cycle.
